# Supplementary material
Source: HighWire-hosted journal article supplement (https://jnm.snmjournals.org/highwire/filestream/94633/field_highwire_adjunct_files/0/141762_Supplemental_Data.pdf)
Supplement: 141762_Supplemental_Data.pdf [file 141762_Supplemental_Data.pdf]

Supplemental Table 1. SPECT and PET data

| SCCNij 202 |         | <sup>111</sup> In-cetuximab-F(ab') <sub>2</sub> |           |            | <sup>18</sup> F-FDG |
|------------|---------|-------------------------------------------------|-----------|------------|---------------------|
|            |         | Tumor mean                                      | Tumor max | Liver mean | SUVmax              |
| -7 d       | 10 Gy   | 1.05E-07                                        | 1.29E-06  | 3.23E-07   | 1.28                |
|            | Control | 1.40E-07                                        | 8.22E-07  | 2.00E-07   | 1.24                |
| 1 d        | 10 Gy   | 7.20E-08                                        | 9.43E-07  | 1.95E-07   | 1.96                |
|            | Control | 7.73E-08                                        | 9.16E-07  | 2.26E-07   | 1.31                |
| 7 d        | 10 Gy   | 1.51E-07                                        | 1.71E-06  | 2.94E-07   | 1.34                |
|            | Control | 9.16E-08                                        | 1.05E-06  | 2.61E-07   | 1.25                |
| 14 d       | 10 Gy   | 1.27E-07                                        | 1.60E-06  | 2.44E-07   | 1.13                |
|            | Control | 9.14E-08                                        | 1.10E-06  | 1.86E-07   | 1.05                |
| SCCNij 167 |         |                                                 |           |            |                     |
| -7 d       | 10 Gy   | 2.80E-08                                        | 4.46E-07  | 2.31E-07   | 3.36                |
|            | Control | 1.74E-08                                        | 4.29E-07  | 2.05E-07   | 2.11                |
| 1 d        | 10 Gy   | 2.97E-08                                        | 5.83E-07  | 2.98E-07   | 2.24                |
|            | Control | 6.42E-08                                        | 4.77E-07  | 1.75E-07   | 2.50                |
| 7 d        | 10 Gy   | 3.98E-08                                        | 4.71E-07  | 2.63E-07   | 2.32                |
|            | Control | 4.11E-08                                        | 3.15E-07  | 1.18E-07   | 2.47                |
| 14 d       | 10 Gy   | 3.02E-08                                        | 5.18E-07  | 2.15E-07   | 3.01                |
|            | Control | 5.12E-08                                        | 3.65E-07  | 1.02E-07   | 2.35                |
